# Supplementary material
Source: publisher figshare collection journal article supplement (https://gsajournals.figshare.com/articles/dataset/_/14036627)
Supplement: Supplementary file 1 [file 1]

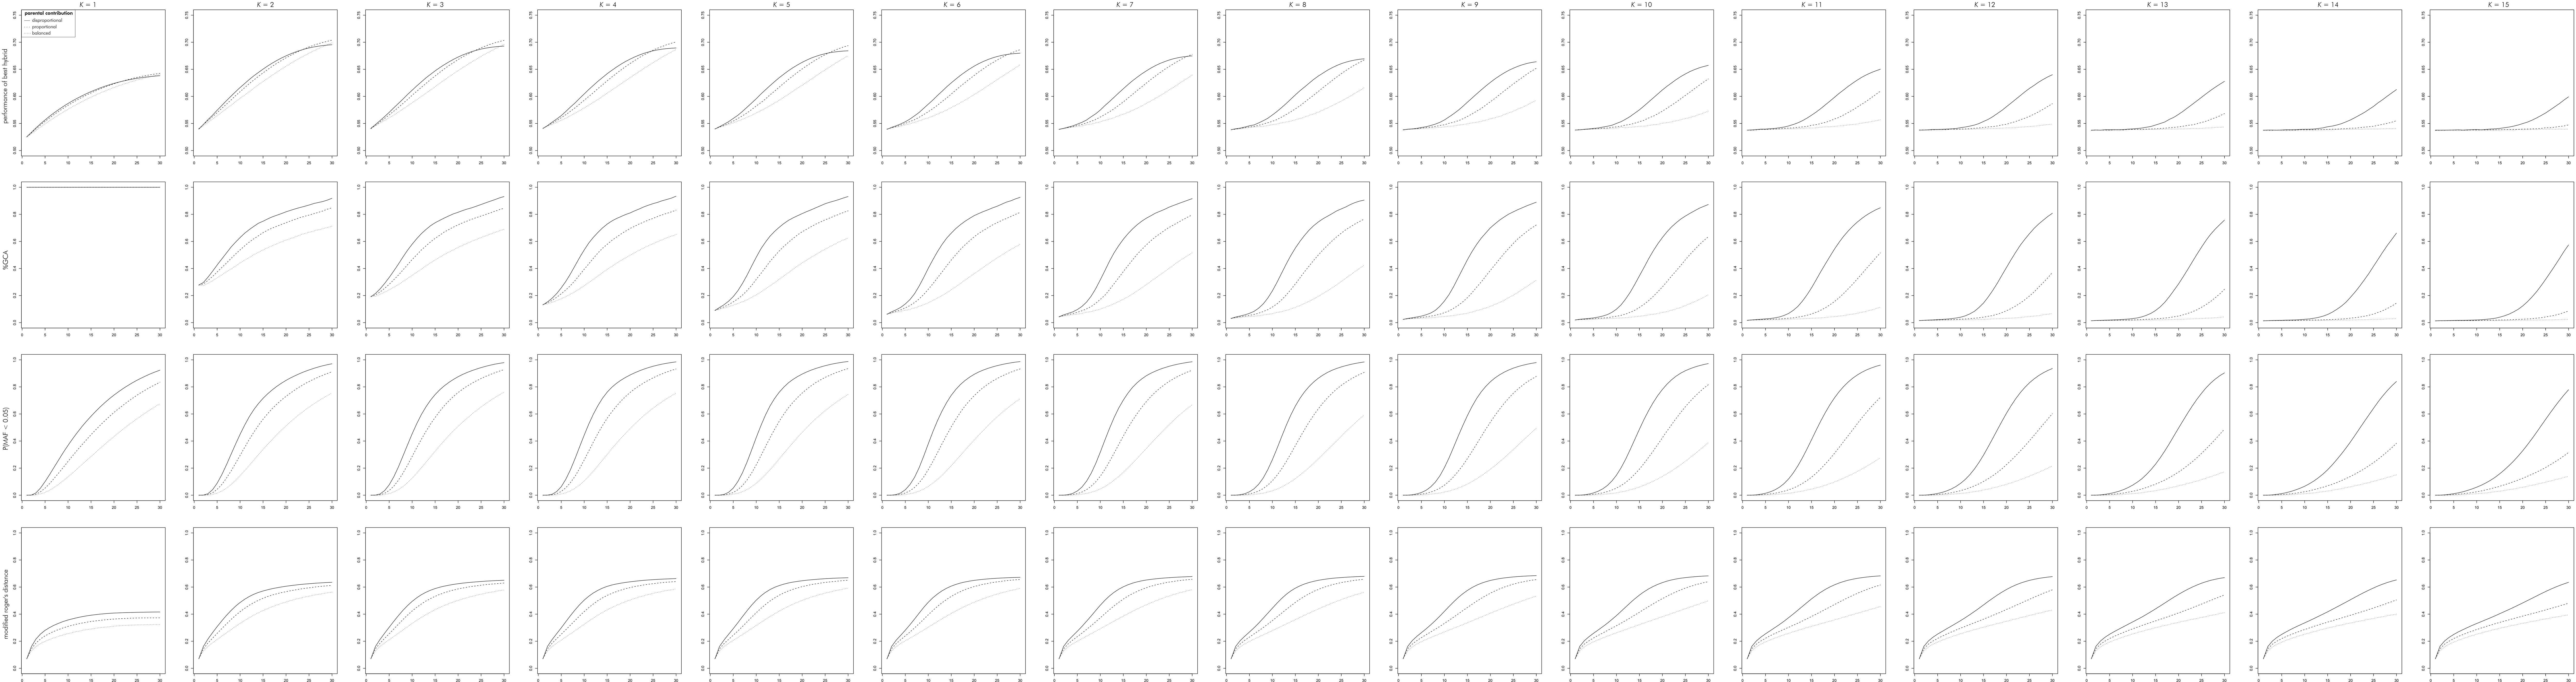

**Figure S2** Evolution of metrics over cycles in the inbred usage theme for all values of complexity parameter  $K$  (columns)
